# Supplementary material
Source: Springer Nature journal article supplement (https://www.springermedizin.de/resource/supplementary/12990_2007_103_MOESM2_ESM.pdf/9612576)

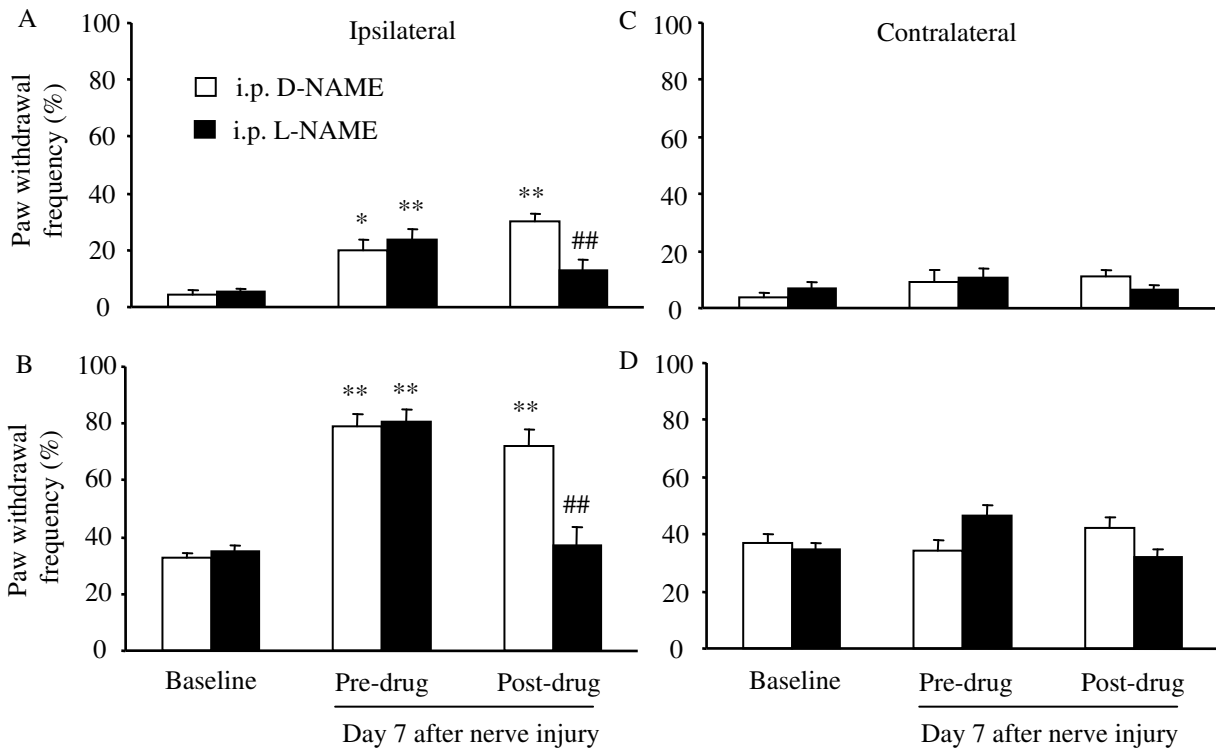

Supplement: MOESM2 [file 9612576]
